# Supplementary material for: Enhancing Pervaporation Membrane Selectivity by Incorporating Star Macromolecules Modified with Ionic Liquid for Intensification of Lactic Acid Dehydration
Source: MDPI journal article supplement (doi:10.3390/polym13111811), 2021-05-31
Supplement: s1 [file s1]

# Supporting Information

**Table S1.** Calculated enthalpies, entropies, and Gibbs free energies (in Hartree) for optimized equilibrium model structures (H, S, and G, respectively).

| Model structure              | H              | S          | G              |
|------------------------------|----------------|------------|----------------|
| H <sub>2</sub> O---PPO       | -456.46739924  | 0.04951203 | -456.51691127  |
| H <sub>2</sub> O---anion_IL  | -1886.23523795 | 0.06386289 | -1886.29910085 |
| H <sub>2</sub> O---cation_IL | -492.93299015  | 0.05523530 | -492.98822546  |
| H <sub>2</sub> O---PS        | -382.08145877  | 0.05090198 | -382.13236075  |
| H <sub>2</sub> O---P2VP      | -397.97620006  | 0.04650876 | -398.02270882  |
| H <sub>2</sub> O---PTBMA     | -534.27067143  | 0.05769469 | -534.32836611  |
| PPO                          | -380.97628712  | 0.04167202 | -381.01795913  |
| anion_IL---PPO               | -2191.71968742 | 0.07955026 | -2191.79923768 |
| anion_IL---PS                | -2117.33799735 | 0.07836844 | -2117.41636579 |
| anion_IL---P2VP              | -2133.23048400 | 0.07653191 | -2133.30701591 |
| anion_IL---PTBMA             | -2269.52513376 | 0.08703361 | -2269.61216737 |
| Anion_IL                     | -1810.73801651 | 0.05687406 | -1810.79489056 |
| cation_IL---PPO              | -798.40923417  | 0.07207407 | -798.48130824  |
| cation_IL---PS               | -724.03616395  | 0.06694017 | -724.10310413  |
| cation_IL---P2VP             | -739.93124531  | 0.06614001 | -739.99738532  |
| cation_IL---PTBMA            | -876.22645632  | 0.07760167 | -876.30405798  |
| Cation_IL                    | -417.42924622  | 0.04727280 | -417.47651901  |
| PS                           | -306.59629603  | 0.03855159 | -306.63484763  |
| lactic_acid---PPO            | -720.34341752  | 0.05995375 | -720.40337128  |
| lactic_acid---anion_IL       | -2150.10491149 | 0.07469293 | -2150.17960442 |
| lactic_acid---cation_IL      | -756.80982009  | 0.06547369 | -756.87529378  |
| lactic_acid---PS             | -645.95426778  | 0.05793907 | -646.01220685  |
| lactic_acid---P2VP           | -661.85148754  | 0.05750299 | -661.90899054  |
| lactic_acid---PTBMA          | -798.14231467  | 0.06744492 | -798.20975959  |
| lactic_acid                  | -339.35039736  | 0.03780734 | -339.38820470  |
| -P2VP                        | -322.48185358  | 0.03889976 | -322.52075334  |
| -PTBMA                       | -458.77868329  | 0.04943740 | -458.82812069  |
| H <sub>2</sub> O             | -75.48516676   | 0.02145942 | -75.50662618   |

**Table S2.** Calculated values of enthalpies and Gibbs free energies of reaction ( $\Delta H$  and  $\Delta G$ ) for various hypothetical supramolecular association processes (in kcal/mol).

| Supramolecular association process                                      | $\Delta H$ | $\Delta G$ |
|-------------------------------------------------------------------------|------------|------------|
| cation_IL + PTBMA $\rightarrow$ cation_IL---PTBMA                       | -11.6      | 0.4        |
| cation_IL + P2VP $\rightarrow$ cation_IL---P2VP                         | -12.6      | -0.1       |
| cation_IL + green PS $\rightarrow$ cation_IL---PS                       | -6.7       | 5.2        |
| anion_IL + PTBMA $\rightarrow$ anion_IL---PTBMA                         | -5.3       | 6.8        |
| anion_IL + red P2VP $\rightarrow$ anion_IL---P2VP                       | -6.7       | 5.4        |
| anion_IL + green PS $\rightarrow$ anion_IL---PS                         | -2.3       | 8.4        |
| cation_IL + PPO $\rightarrow$ cation_IL---PPO                           | -2.3       | 8.3        |
| anion_IL + PPO $\rightarrow$ anion_IL---PPO                             | -3.4       | 8.5        |
| H <sub>2</sub> O + PPO $\rightarrow$ H <sub>2</sub> O---PPO             | -3.7       | 4.8        |
| lactic_acid + PPO $\rightarrow$ lactic_acid---PPO                       | -10.5      | 1.8        |
| H <sub>2</sub> O + PTBMA $\rightarrow$ H <sub>2</sub> O---PTBMA         | -4.3       | 4.0        |
| lactic_acid + PTBMA $\rightarrow$ lactic_acid---PTBMA                   | -8.3       | 4.1        |
| H <sub>2</sub> O + P2VP $\rightarrow$ H <sub>2</sub> O---P2VP           | -5.8       | 2.9        |
| lactic_acid + P2VP $\rightarrow$ lactic_acid---P2VP                     | -12.1      | 0.0        |
| H <sub>2</sub> O + PS $\rightarrow$ H <sub>2</sub> O---PS               | 0.0        | 5.7        |
| lactic_acid + PS $\rightarrow$ lactic_acid---PS                         | -4.8       | 6.8        |
| H <sub>2</sub> O + cation_IL $\rightarrow$ H <sub>2</sub> O---cation_IL | -11.7      | -3.2       |
| lactic_acid + cation_IL $\rightarrow$ lactic_acid---cation_IL           | -18.9      | -6.6       |
| H <sub>2</sub> O + anion_IL $\rightarrow$ H <sub>2</sub> O---anion_IL   | -7.6       | 1.5        |
| lactic_acid + anion_IL $\rightarrow$ lactic_acid---anion_IL             | -10.4      | 2.2        |
